# Supplementary material for: Usefulness of Wearable Cameras as a Tool to Enhance Chronic Disease Self-Management: Scoping Review
Source: PubMed Central journal article supplement (PMC6682294; doi:10.2196/10371), 2019-01-03
Supplement: mhealth_v7i1e10371_app1.pdf [file mhealth_v7i1e10371_app1.pdf]

Search Strategy: Usefulness of wearable cameras as a tool to enhance chronic disease self-management: Scoping review.

| Embase                                                              | Web of science              | PsycINFO, Medline, CINAHL, SPORTdiscuss (through EBSCO) | Proquest                                        | Cochrane Library       | ACM Digital Library      |
|---------------------------------------------------------------------|-----------------------------|---------------------------------------------------------|-------------------------------------------------|------------------------|--------------------------|
| Wearable cameras.mp                                                 | wearable camer*             | "wearable camer*"                                       | "wearable camer*"                               | Wearable cameras       | "wearable camera"        |
| Life-logging.mp                                                     | Life-logging                | Life-logging                                            | Life-logging                                    | Life-logging           | "life-logging"           |
| Sensecam.mp                                                         | SenseCam                    | SenseCam                                                | SenseCam                                        | SenseCam               | "SenseCam"               |
| Narrative clip.mp                                                   | Narrative clip              | "Narrative clip"                                        | "Narrative clip"                                | Narrative clip         | "Narrative clip"         |
| GoPro.mp                                                            | GoPro                       | GoPro                                                   | GoPro                                           | GoPro                  | "GoPro"                  |
| Google glass.mp                                                     | Google Glass                | "Google Glass"                                          | "Google Glass"                                  | Google Glass           | "Google Glass"           |
| <b>AND</b>                                                          | <b>AND</b>                  | <b>AND</b>                                              | <b>AND</b>                                      | <b>AND</b>             |                          |
| exp chronic disease/                                                | ("Chronic diseas*"          | "Chronic Diseas*"                                       | "Chronic Diseas*"                               | Chronic disease        | "chronic disease"        |
| exp lifestyle/                                                      | "life-style behaviour"      | life-style                                              | life-style                                      | Lifestyle behaviour    | "lifestyle behaviour"    |
| exp lifestyle modification/                                         | ("Life-style modification") | "lifestyle modification"                                | "lifestyle modification"                        | Lifestyle modification | "lifestyle modification" |
| exp rehabilitation/                                                 | Rehab*                      | Rehab*                                                  | Rehab*                                          | Rehab*                 | "Rehab*"                 |
| exp diet/                                                           | Diet*                       | Diet*                                                   | Diet*                                           | Diet                   | "Diet"                   |
| exp exercise/ or exp physical activity/ or exp physical performance | "Physical activ             |                                                         | "Physical activit*" "motor activit* OR exercise | Physical activity      | "physical activity"      |
| exp medication compliance/                                          | "Medication Adherence"      | "Medication adherence" OR medication compliance         | "Medication adherence" OR medication compliance | Medication adherence   | "medication adherence"   |
| "Fluid restriction".mp.                                             |                             |                                                         |                                                 |                        | "fluid restriction"      |
| Exp cigarette smoke/ or exp tobacco smoke/                          | "Fluid restriction"         | "Fluid restriction"                                     | "Fluid restriction"                             | Fluid restriction      | "smoking"                |
