# Supplementary material for: Usefulness of Wearable Cameras as a Tool to Enhance Chronic Disease Self-Management: Scoping Review
Source: PubMed Central journal article supplement (PMC6682294; doi:10.2196/10371), 2019-01-03
Supplement: mhealth_v7i1e10371_app2.pdf [file mhealth_v7i1e10371_app2.pdf]

Data Extraction Sheet: Usefulness of wearable cameras as a tool to enhance chronic disease self-management: Scoping review.

**Paper overview**

Authors / Title / Year / Country / Journal / Study Design

Camera device / Interval of images taken

Data collection (primary / secondary)

Study aim

**Measuring lifestyle**

Lifestyle behaviour (eg. Physical activity, diet etc)

Lifestyle behaviour (measuring / changing)

Identified behaviours

**Study details**

Population / Sample size / Characteristics

Intervention duration

Control group (y/n)

Type of image annotation (manual / automatic)

Annotation details

Data analysis

% of images that cannot be analysed

Challenges/issues with cameras

Key findings

**Other comments / notes**
