# Supplementary material for: Usefulness of Wearable Cameras as a Tool to Enhance Chronic Disease Self-Management: Scoping Review
Source: PubMed Central journal article supplement (PMC6682294; doi:10.2196/10371), 2019-01-03
Supplement: mhealth_v7i1e10371_app3.pdf [file mhealth_v7i1e10371_app3.pdf]

Characteristics of primary and secondary data collection studies (n=25).

| Study                 | Country        | Design                  | Camera device                | Duration device worn | Sample size and characteristics                                                                         | Key findings                                                                                                                                                                                     |
|-----------------------|----------------|-------------------------|------------------------------|----------------------|---------------------------------------------------------------------------------------------------------|--------------------------------------------------------------------------------------------------------------------------------------------------------------------------------------------------|
| <b>Dietary intake</b> |                |                         |                              |                      |                                                                                                         |                                                                                                                                                                                                  |
| Arab, 2011 [27]       | United States  | Primary (feasibility)   | Camera-equipped mobile phone | 3 independent days   | 14 healthy adults                                                                                       | Dietary recall was facilitated with automated imaging. Images were deemed helpful by participants, but wearing device was difficult.                                                             |
| Cowburn, 2016 [15]    | United Kingdom | Primary (feasibility)   | SenseCam                     | 4 days               | 22 school students (13-15 years of age)                                                                 | Interviews combined with SenseCam images assisted in identifying unreported items and misreporting errors.                                                                                       |
| Gemming, 2013 [28]    | United Kingdom | Primary (feasibility)   | SenseCam                     | 2 days               | 10 healthy adults                                                                                       | Wearable cameras enhanced 24 hour dietary recall by objectively revealing unreported foods and misreporting errors.                                                                              |
| Gemming, 2015 [25]    | New Zealand    | Secondary (feasibility) | SenseCam                     | 4 days               | 40 healthy adults                                                                                       | SenseCam images were feasible for enhancing dietary assessment data by objectively assessing context of eating.                                                                                  |
| Gemming, 2015 [14]    | New Zealand    | Primary (validation)    | SenseCam                     | 4 days               | 40 healthy adults                                                                                       | SenseCam images enhanced self-report accuracy of dietary recall.                                                                                                                                 |
| Ng, 2015 [29]         | International  | Primary (feasibility)   | Autographer                  | 1 week               | 18 participants who were main household shopper                                                         | The use of wearable cameras provided high-level overview and spatial data on food-related practices.                                                                                             |
| O'Loughlin, 2013 [30] | Ireland        | Primary (feasibility)   | SenseCam                     | 1 day                | 47 participants including trainee jockeys, Gaelic footballers and physically active university students | Total energy intake was more accurately calculated when SenseCam was used in conjunction with a food diary.                                                                                      |
| Pettitt, 2016 [31]    | United Kingdom | Primary (pilot)         | Wearable micro-camera        | 2 days               | 6 healthy adults                                                                                        | Combining images from micro-camera with food diaries improved the accuracy of dietary assessment. In addition valuable information on macronutrient intake and eating rate obtained from images. |
| Thomaz, 2013 [32]     | United States  | Primary (feasibility)   | Standard mobile phone        | 3 days               | 5 participants                                                                                          | From 17,575 automatically captured images eating moments were accurately identified with 89.68% accuracy.                                                                                        |

| Physical activity          |                |                            |             |                   |                                        |                                                                                                                                                                       |
|----------------------------|----------------|----------------------------|-------------|-------------------|----------------------------------------|-----------------------------------------------------------------------------------------------------------------------------------------------------------------------|
| Connor, 2016 [33]          | Ireland        | Primary (validation)       | SenseCam    | 1 day             | 30 collegiate Gaelic footballers       | Self-recall training diaries were successfully validated with data fused from the SenseCam and accelerometer.                                                         |
| Doherty, 2013 [34]         | International  | Primary (feasibility)      | SenseCam    | 3 days            | 52 university workers                  | Wearable cameras successfully complemented accelerometer data to objectively identify behavioral type and context information across different activity episodes.     |
| Ellis, 2013* [35]          | United States  | Primary (methodological)   | SenseCam    | 3-4 days          | 40 healthy adults                      | Machine learning techniques for data classification has improved accuracy when trained on free-living data compared to training on controlled or lab data.            |
| Nebeker, 2016 [36]         | United States  | Primary (feasibility)      | SenseCam    | 1 week            | 82 participants                        | Survey of participants wearing SenseCam found primary concern was device comfort and privacy.                                                                         |
| Rosenberg, 2017 [37]       | United States  | Secondary (methodological) | SenseCam    | 1 weeks           | 39 older women                         | SenseCam provided “ground truth annotation” to develop free-living algorithms for walking and sedentary time.                                                         |
| Activities of daily living |                |                            |             |                   |                                        |                                                                                                                                                                       |
| Cuberos-Urbano, 2016 [38]  | Spain          | Primary (RCT)              | SenseCam    | 7 weeks           | 16 patients with acquired brain injury | Compared to goal management training (GMT) alone, a combination of viewing SenseCam images with GMT resulted in improvements to cognitive skills and quality of life. |
| Doherty, 2011 [39]         | Ireland        | Primary (methodological)   | SenseCam    | Average 15.1 days | 33 participants                        | Successful evaluation of new technique for eliciting personal traits automatically from visual lifelogs.                                                              |
| Kelly, 2015 [16]           | United Kingdom | Primary (feasibility)      | Autographer | 1 day             | 14 participants                        | Wearable cameras are feasible and acceptable for assessing the validity of 24 hour time use diaries.                                                                  |
| Signal, 2017 [40]          | New Zealand    | Primary (methodological)   | Autographer | 4 days            | Not stated                             | Methodology described enabled objective, automated observation of children’s lives in a range of settings. 95% of Autographer images could be coded.                  |

|                           |                |                            |             |                         |                                                                                    |                                                                                                                                                                                                                                         |
|---------------------------|----------------|----------------------------|-------------|-------------------------|------------------------------------------------------------------------------------|-----------------------------------------------------------------------------------------------------------------------------------------------------------------------------------------------------------------------------------------|
| Wang, 2013 [41]           | Ireland        | Primary (methodological)   | SenseCam    | 7 days (4 participants) | 13 participants from research group. Data from 4 participants used for evaluation. | Successful application of an algorithm to detect 16 everyday activities.                                                                                                                                                                |
| <b>Sedentary behavior</b> |                |                            |             |                         |                                                                                    |                                                                                                                                                                                                                                         |
| Kerr, 2013 [42]           | United States  | Primary (validation)       | SenseCam    | 3-5 days                | 40 adult cyclists                                                                  | Comparing SenseCam and ActiGraph sedentary behavior data demonstrated a difference of only 30 minutes in daily estimates. Sitting was not always inactive- SenseCam maybe a useful tool to understand health behaviors such as sitting. |
| Leask, 2015 [17]          | United Kingdom | Primary (descriptive)      | Vicon Revue | 1-7 days                | 33 participants                                                                    | The majority of sedentary time in older adults is accumulated at home, in the afternoon, for leisure and in social isolation.                                                                                                           |
| Marinac, 2013 [43]        | United States  | Primary (feasibility)      | SenseCam    | 1-2 days                | 28 adult commuter cyclists                                                         | SenseCam was feasible to measure type and context of sedentary behavior. Wear-time of the SenseCam impacted the daily estimates of sedentary behavior.                                                                                  |
| Moghimi, 2014 [44]        | United States  | Secondary (methodological) | SenseCam    | 3-5 days                | 40 university workers who regularly cycle for transportation                       | Deep learning based classifier techniques applied and performed better than state-of-the-art visual classification methods.                                                                                                             |
| <b>Travel behavior</b>    |                |                            |             |                         |                                                                                    |                                                                                                                                                                                                                                         |
| Kelly, 2012 [45]          | United Kingdom | Primary (feasibility)      | SenseCam    | 1 week                  | 17 adolescents                                                                     | SenseCam provided feasible technique to measure travel to school behavior. Self-reported journey duration data was accurate at the mean group level, but imprecise at the individual level.                                             |
| Kelly, 2014 [46]          | International  | Primary (validation)       | SenseCam    | 3-4 days                | 84 participants                                                                    | Self-reported travel diary data valid for journey level and summary of daily travel duration at a group level, but unreliable at the individual level (journey, day and participant).                                                   |

\*denotes conference proceedings
